# Supplementary material
Source: Springer Nature journal article supplement (https://www.springermedizin.de/resource/supplementary/13054_2011_9610_MOESM4_ESM.pdf/9706468)

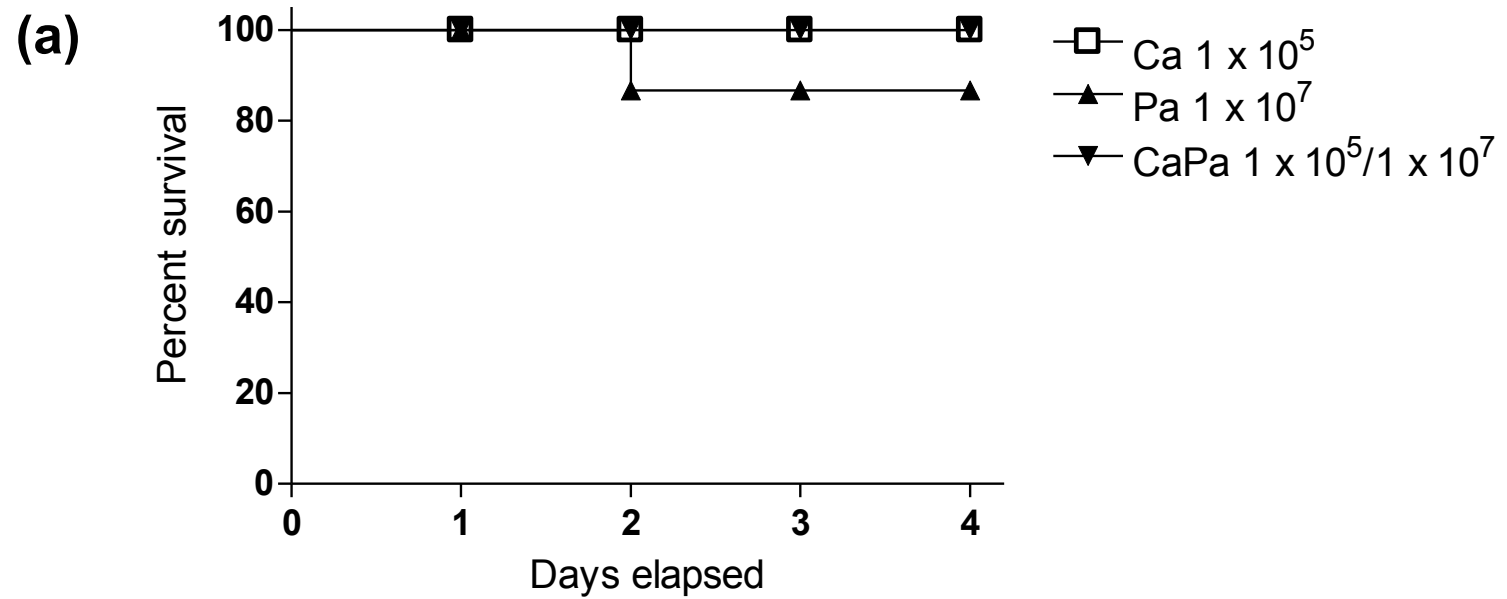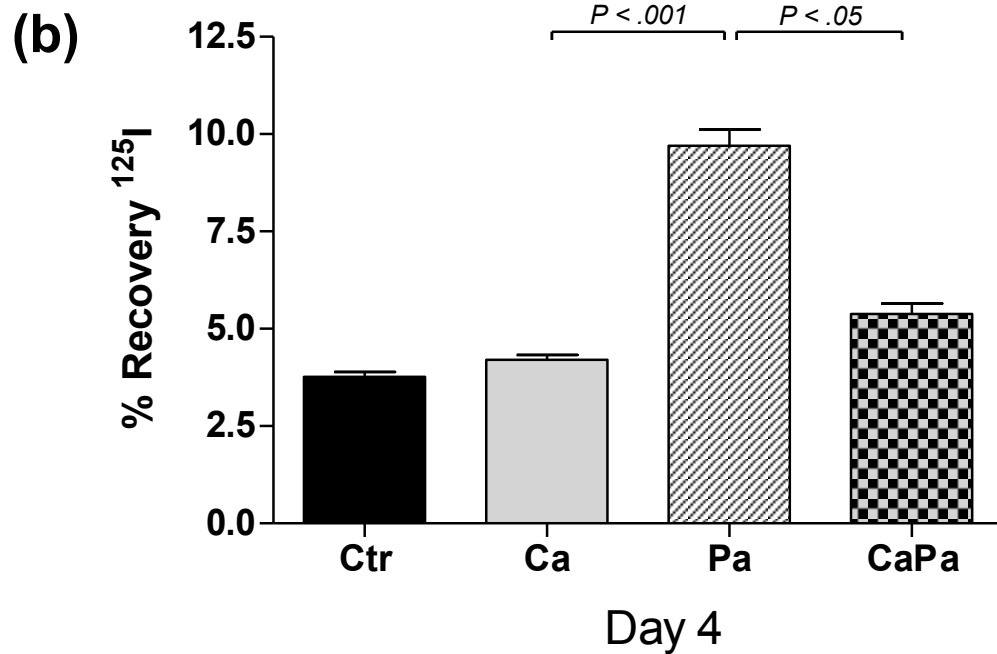

Supplement: MOESM4 [file 9706468]
